# Supplementary material
Source: publisher figshare collection journal article supplement (https://acs.figshare.com/ndownloader/files/4282276)
Supplement: Supplementary file 1 [file 4282276]

# Supporting Information for

## Withanolides from the Rhizomes of *Dioscorea japonica* and Their Cytotoxicity

Ki Hyun Kim,<sup>†</sup> Sang Un Choi,<sup>‡</sup> Sang Zin Choi,<sup>§</sup> Mi Won Son,<sup>§</sup> and Kang Ro Lee<sup>\*,†</sup>

<sup>†</sup>Natural Products Laboratory, School of Pharmacy, Sungkyunkwan University, Suwon 440-746, Korea, <sup>‡</sup>Korea Research Institute of Chemical Technology, Teajeon 305-600, Korea, and <sup>§</sup>Dong-A Pharm Institute, Kiheung, Yongin, 449-905, Korea

### Supporting Information Contents:

|                                                                                          |     |
|------------------------------------------------------------------------------------------|-----|
| 1. The <sup>1</sup> H NMR spectrum of <b>1</b> (dioscorolide A).....                     | S2  |
| 2. The <sup>13</sup> C NMR spectrum of <b>1</b> (dioscorolide A).....                    | S3  |
| 3. The DEPT spectrum of <b>1</b> (dioscorolide A).....                                   | S4  |
| 4. The <sup>1</sup> H- <sup>1</sup> H COSY spectrum of <b>1</b> (dioscorolide A).....    | S5  |
| 5. The HMQC spectrum of <b>1</b> (dioscorolide A).....                                   | S6  |
| 6. The HMBC spectrum of <b>1</b> (dioscorolide A).....                                   | S7  |
| 7. The NOESY spectrum of <b>1</b> (dioscorolide A).....                                  | S8  |
| 8. The <sup>1</sup> H NMR spectrum of <b>2</b> (dioscorolide B).....                     | S9  |
| 9. The <sup>13</sup> C NMR spectrum of <b>2</b> (dioscorolide B).....                    | S10 |
| 10. The <sup>1</sup> H NMR spectrum of the synthesized <b>2</b> .....                    | S11 |
| 11. Effects of compounds <b>1-2</b> on NGF secretion in C6 cells and cell viability..... | S12 |

1. The  $^1\text{H}$  NMR spectrum of **1** ( $\text{CDCl}_3$ , 500 MHz)

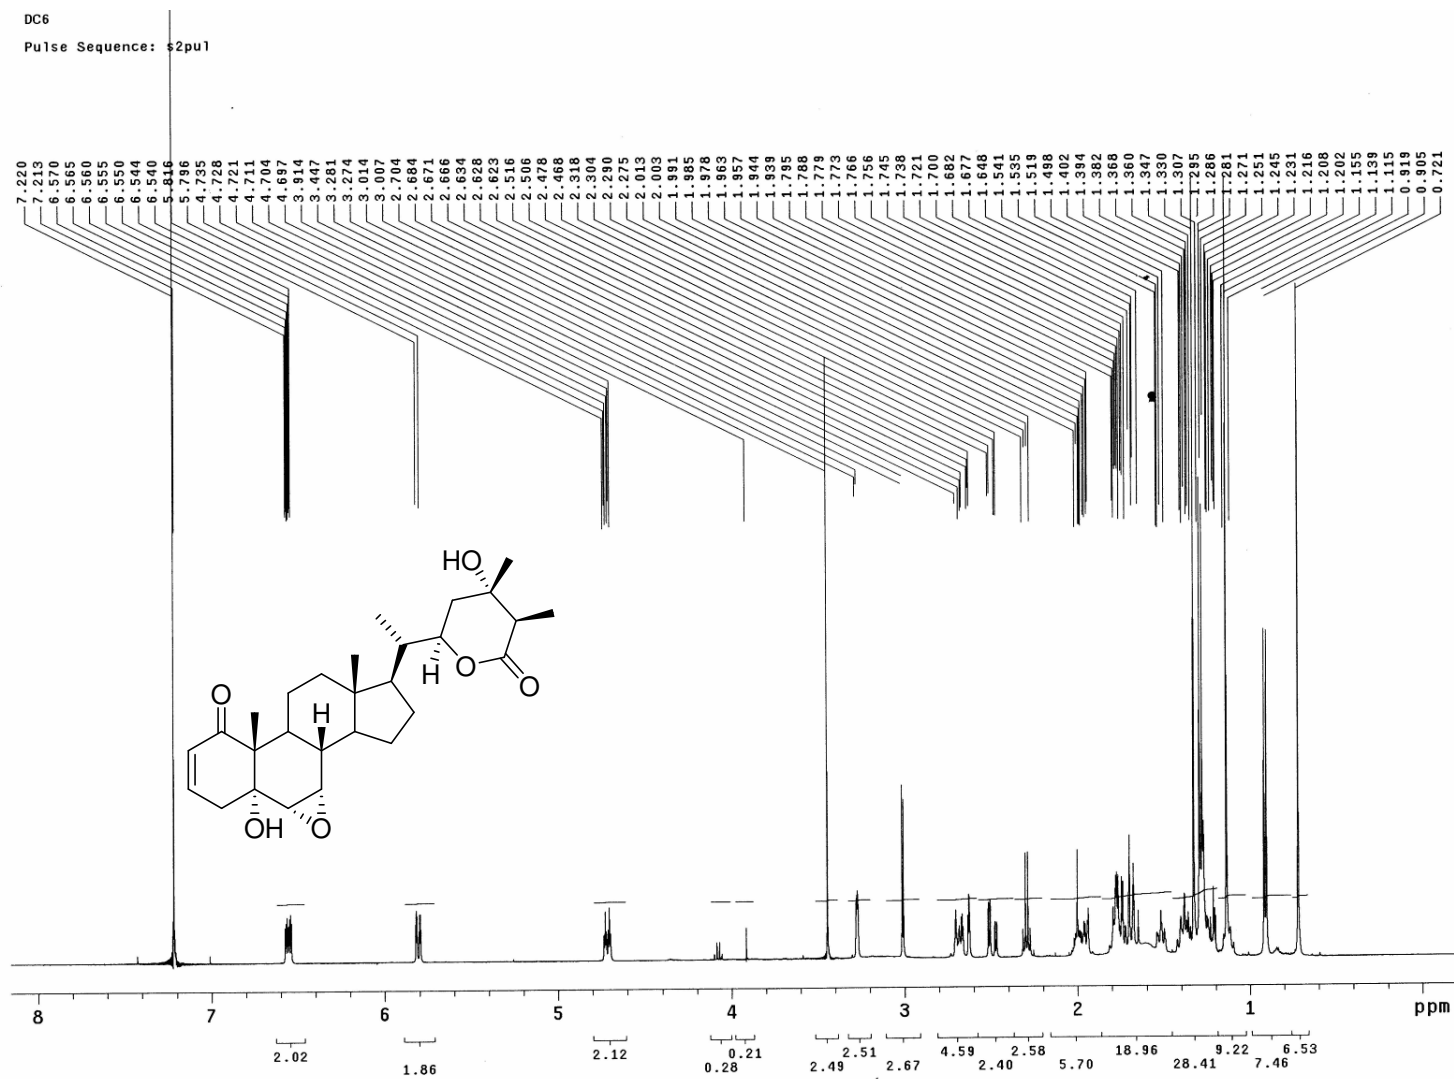

2. The  $^{13}\text{C}$  NMR spectrum of **1** ( $\text{CDCl}_3$ , 125 MHz)

DC6\_13C\_1D

Pulse Sequence: s2pu1

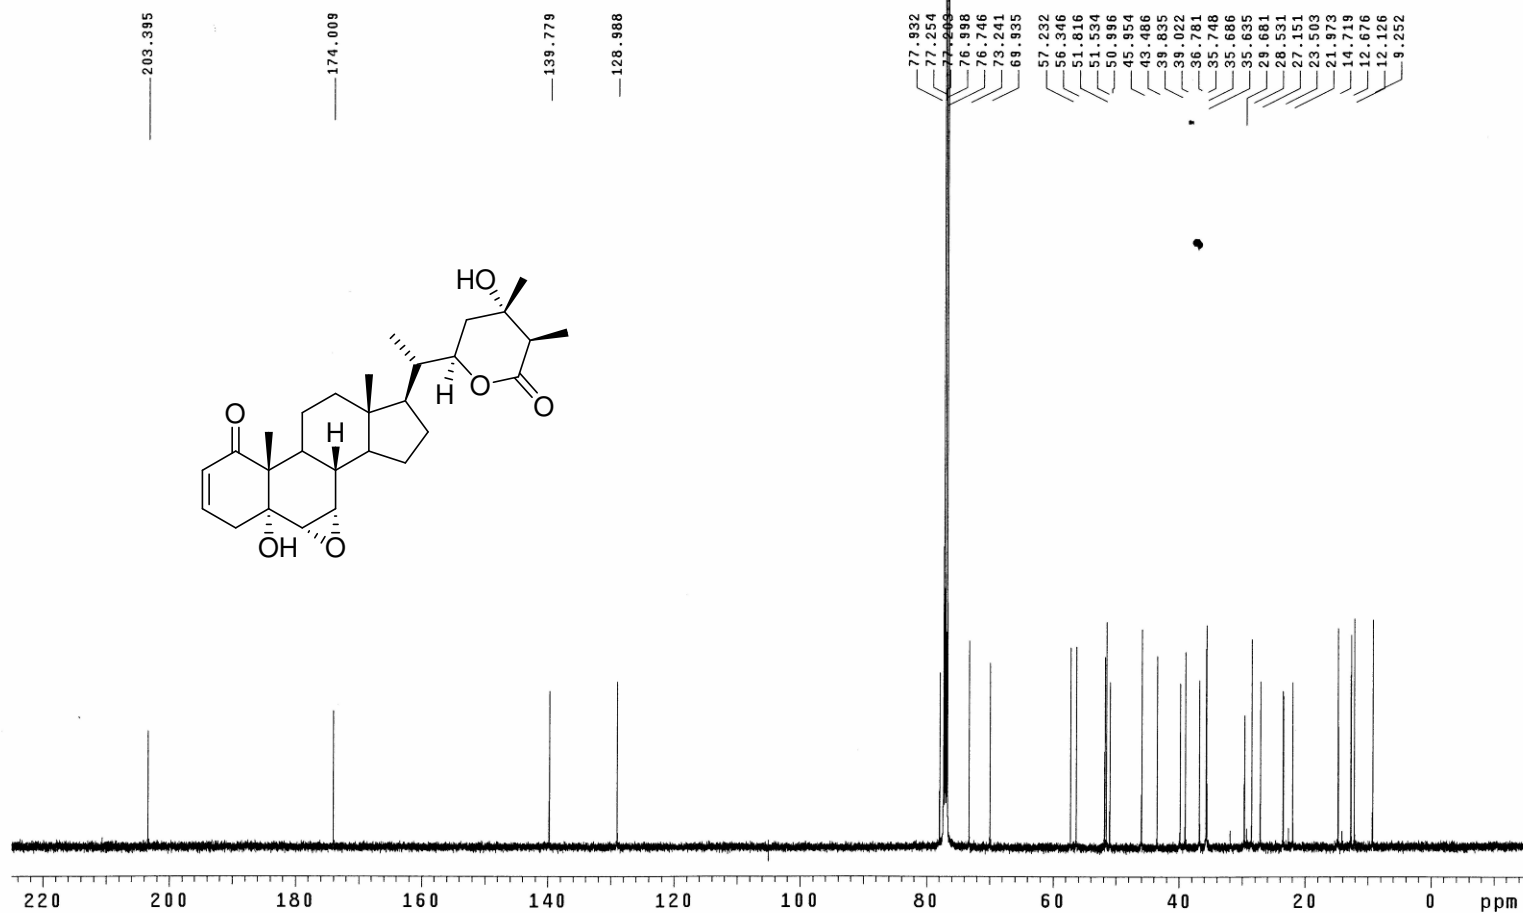

### 3. The DEPT spectrum of **1**

DC6\_DEPT

Pulse Sequence: DEPT

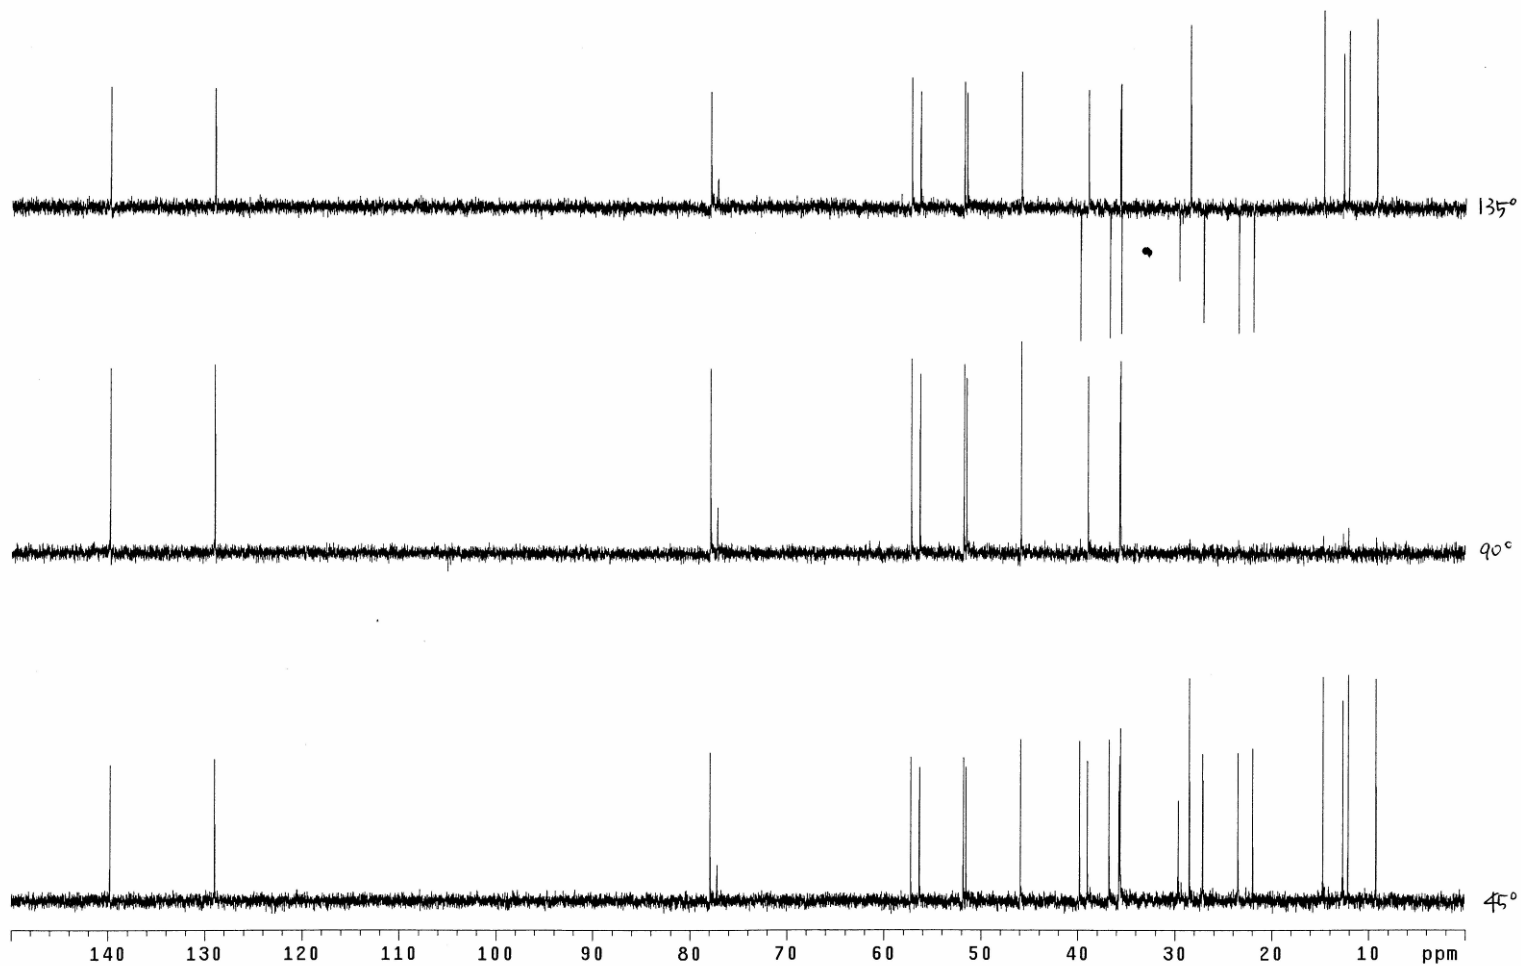

#### 4. The $^1\text{H}$ - $^1\text{H}$ COSY spectrum of **1**

DC6\_COSY

Pulse Sequence: gCOSY  
Solvent: cdc13  
Temp: 25.0 C / 298.1 K  
Operator: vnmr1  
INOVA-500 "Varian-NMR"

Relax. delay 2.000 sec  
Acq. time 0.128 sec  
Width 8004.8 Hz  
2D Width 8004.8 Hz  
48 repetitions  
128 increments  
OBSERVE H1, 500.2892520 MHz  
DATA PROCESSING  
Sine bell 0.064 sec  
F1 DATA PROCESSING  
Sine bell 0.032 sec  
FT size 2048 x 2048  
Total time 3 hr, 41 min, 3 sec

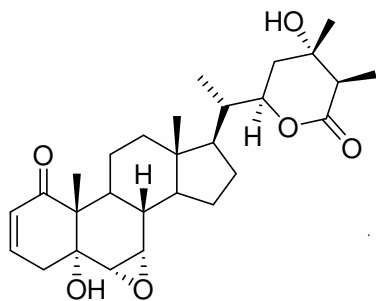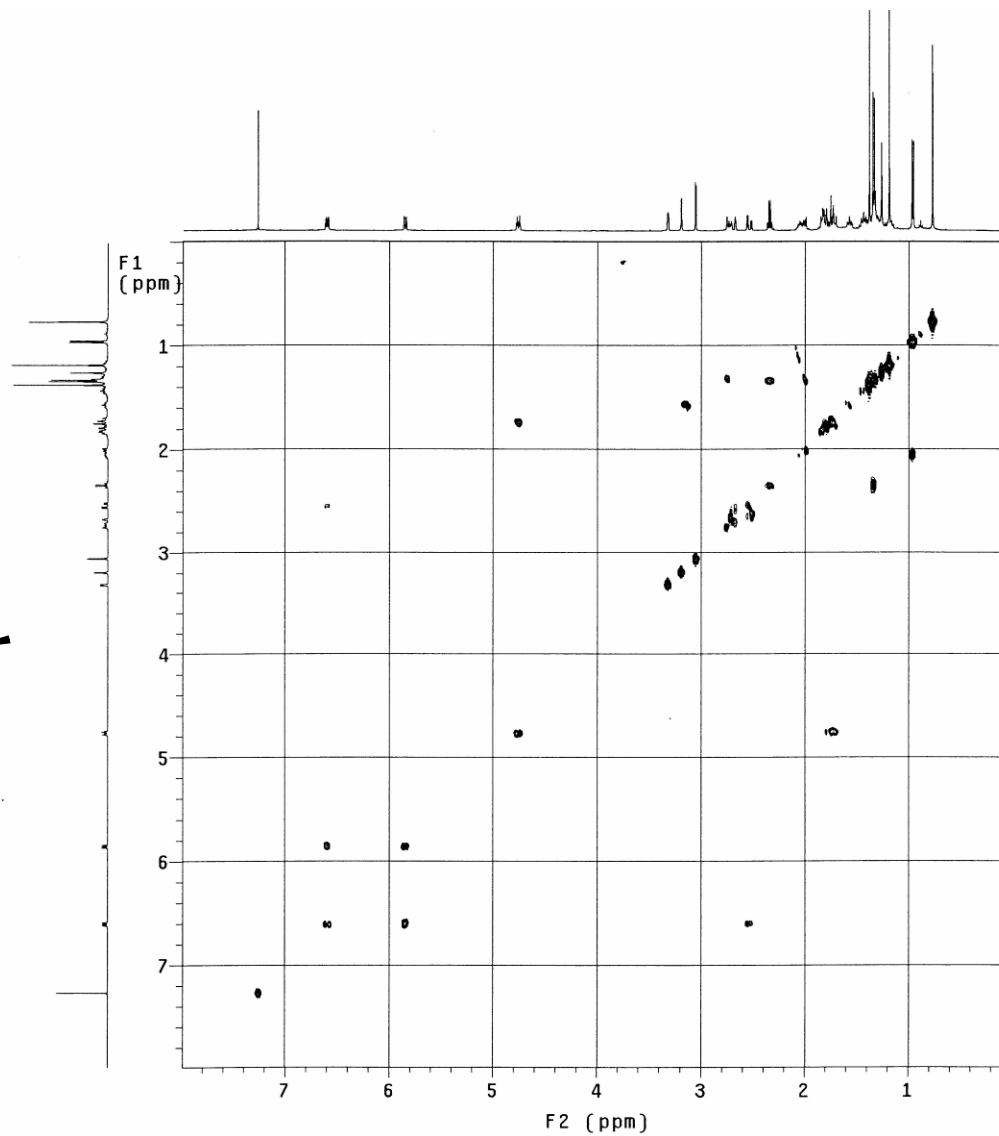

S5

## 5. The HMQC spectrum of **1**

DC6\_HMQC

Pulse Sequence: gHMQC

Solvent: cdc13

Temp. 25.0 C / 298.1 K

Operator: vnmr1

File: DC6\_HMQC

INOVA-500 "Varian-NMR"

Relax. delay 2.000 sec

Acq. time 0.128 sec

Width 8004.8 Hz

2D Width 21384.7 Hz

64 repetitions

2 x 128 increments

OBSERVE H1, 500.3022807 MHz

DECOUPLE C13, 125.8105436 MHz

Power 44 dB

on during acquisition

off during delay

W40\_id modulated

DATA PROCESSING

Gauss apodization 0.059 sec

F1 DATA PROCESSING

Gauss apodization 0.011 sec

FT size 4096 x 2048

Total time 9 hr, 54 min, 24 sec

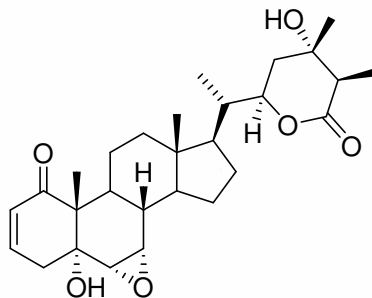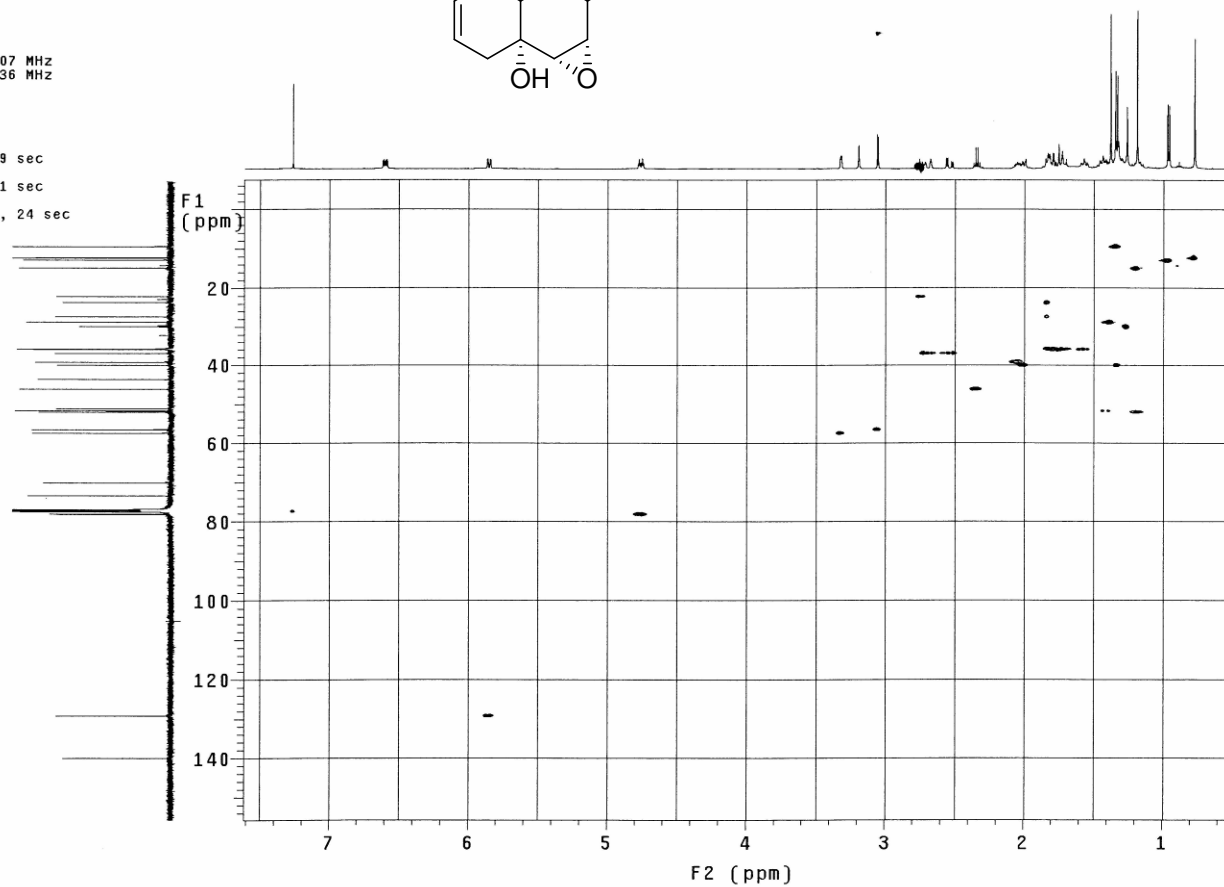

## 6. The HMBC spectrum of 1

DC6\_HMBC

Pulse Sequence: gHMBC

Solvent: cdc13

Temp. 25.0 C / 298.1 K

Operator: vnmr1

File: DC6\_HMBC

INOVA-500 "Varian-NMR"

Relax. delay 2.000 sec

Mixing 0.080 sec

Acq. time 0.128 sec

Width 8004.8 Hz

2D Width 30188.7 Hz

96 repetitions

128 increments

OBSERVE H1, 500.3022807 MHz

DATA PROCESSING

Sine bell 0.064 sec

F1 DATA PROCESSING

Sine bell 0.008 sec

FT size 4096 x 2048

Total time 7 hr, 35 min, 2 sec

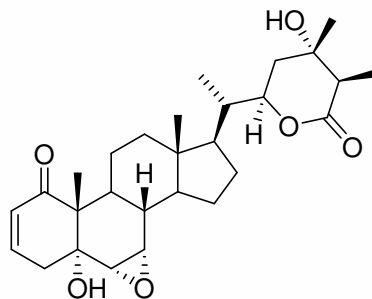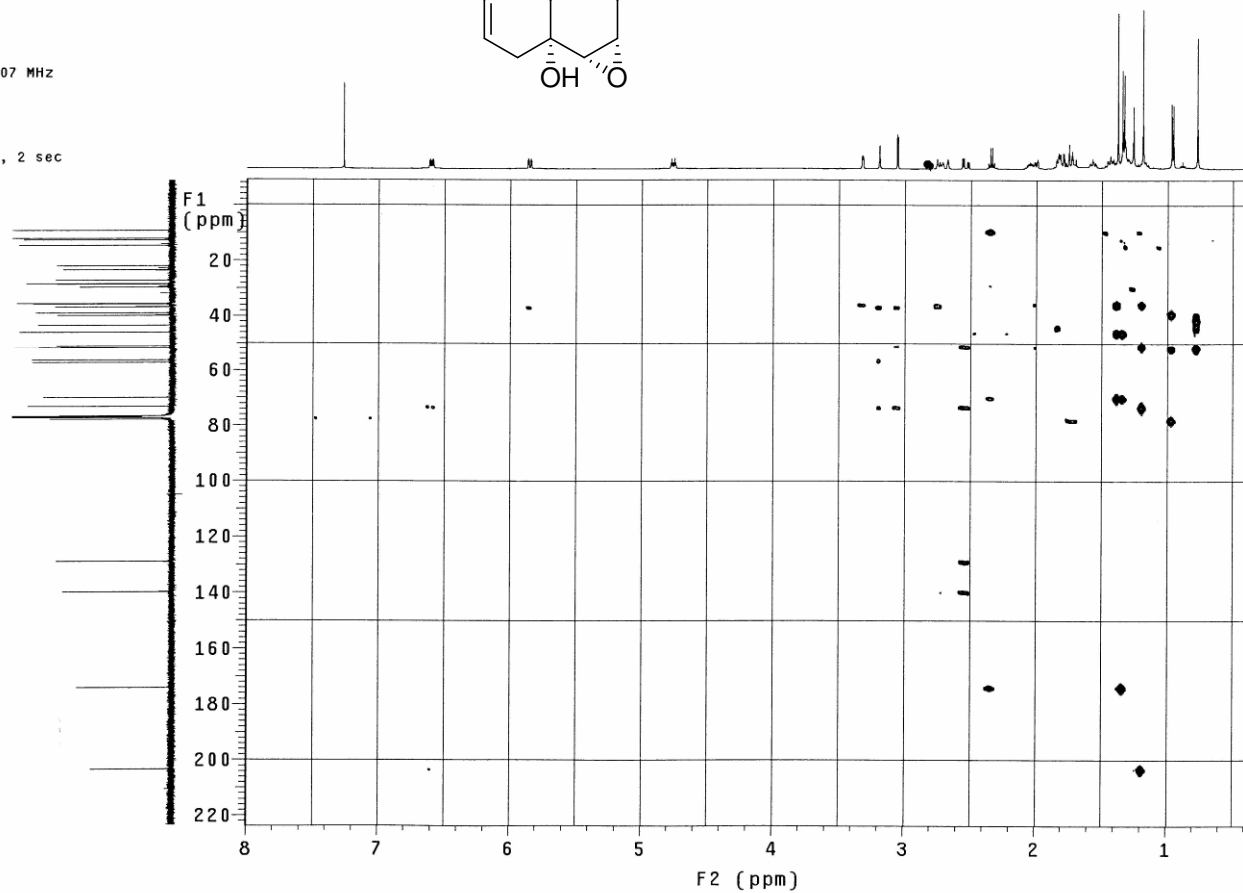

## 7. The NOESY spectrum of **1**

DC6\_NOESY

Pulse Sequence: NOESY

Solvent: cdc13

Temp. 25.0 C / 298.1 K

Operator: vnmr1

File: DC6\_NOESY\_org

INOVA-500 "Varian-NMR"

Relax. delay 2.000 sec

Mixing 0.400 sec

Acq. time 0.128 sec

Width 8004.8 Hz

2D Width 8004.8 Hz

96 repetitions

2 x 128 increments

OBSERVE H1, 500.3022807 MHz

DATA PROCESSING

Gauss apodization 0.059 sec

F1 DATA PROCESSING

Gauss apodization 0.029 sec

FT size 2048 x 2048

Total time 17 hr, 37 min, 35 sec

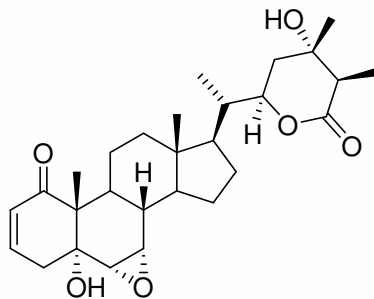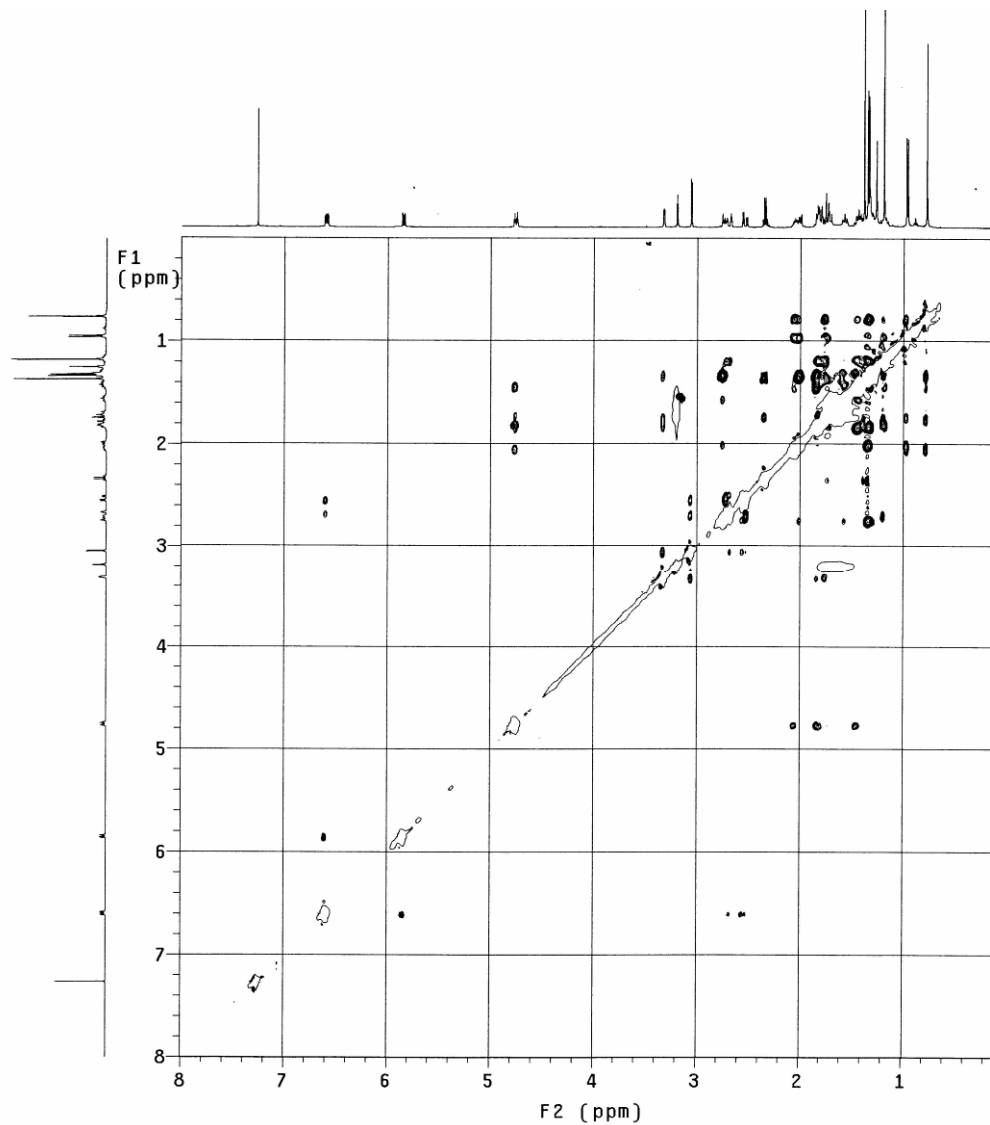



8. The  $^1\text{H}$  NMR spectrum of **2** ( $\text{CDCl}_3$ , 500 MHz)

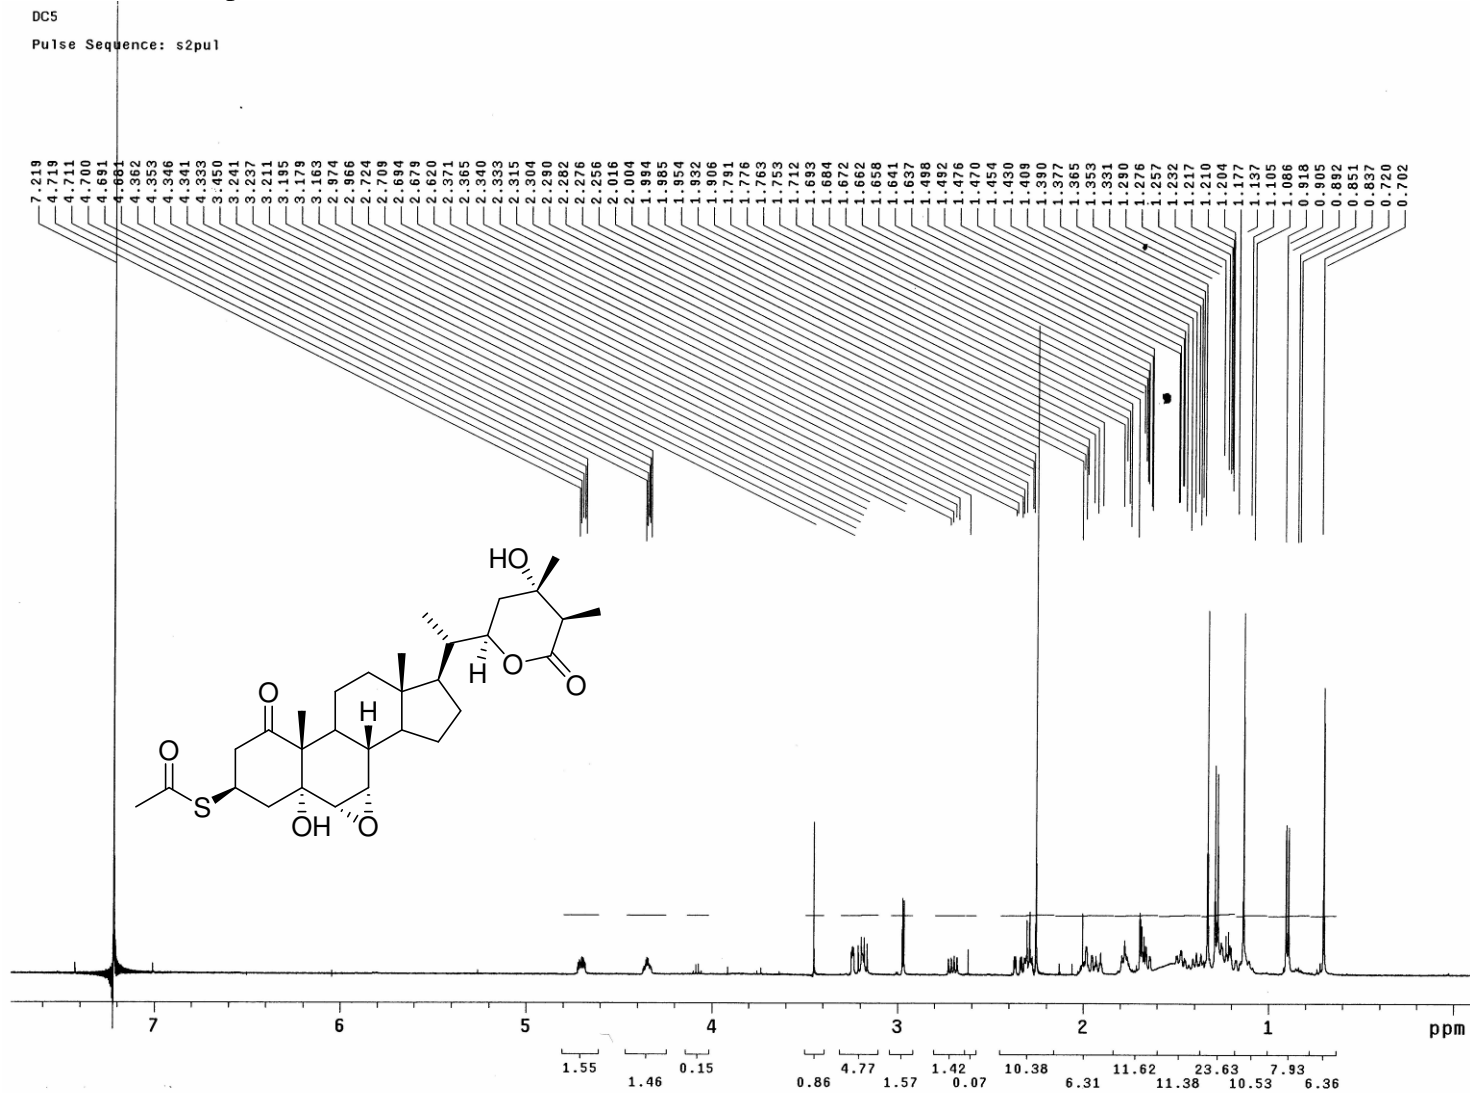

9. The  $^{13}\text{C}$  NMR spectrum of **2** ( $\text{CDCl}_3$ , 125 MHz)

DC\_13C\_10

Pulse Sequence: s2pu1

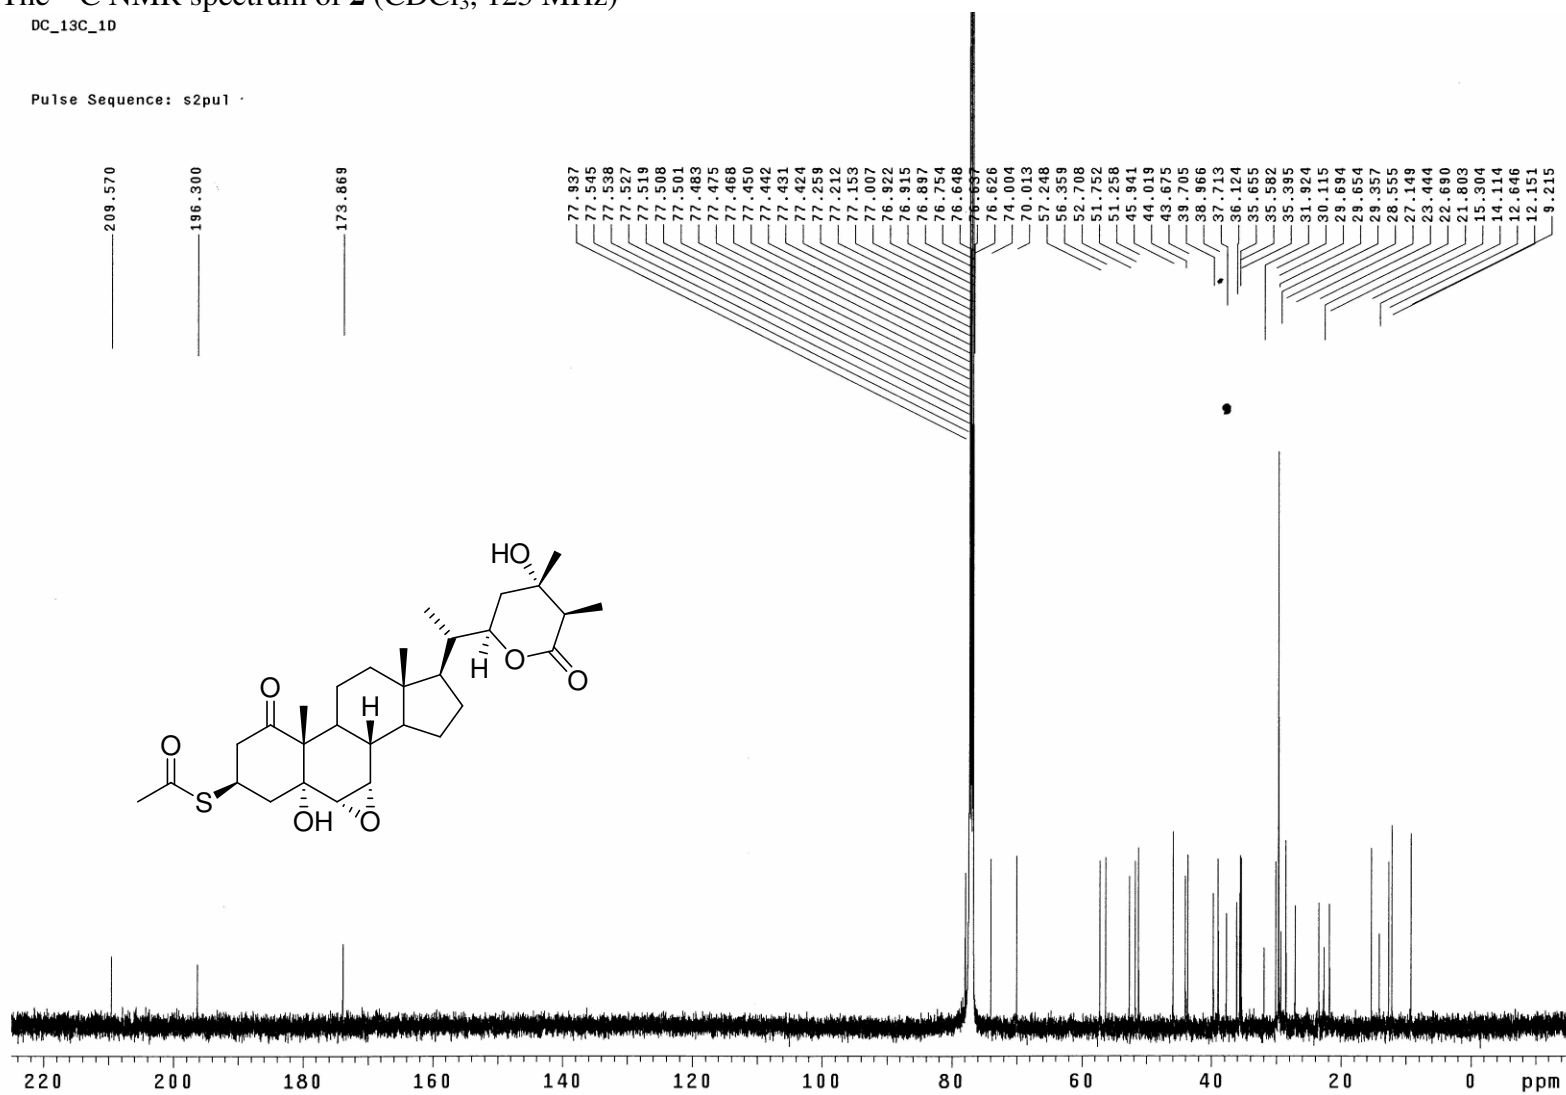

10. The  $^1\text{H}$  NMR spectrum of the synthesized **2** ( $\text{CDCl}_3$ , 500 MHz)

DC5-syn

Pulse Sequence: s2pu1

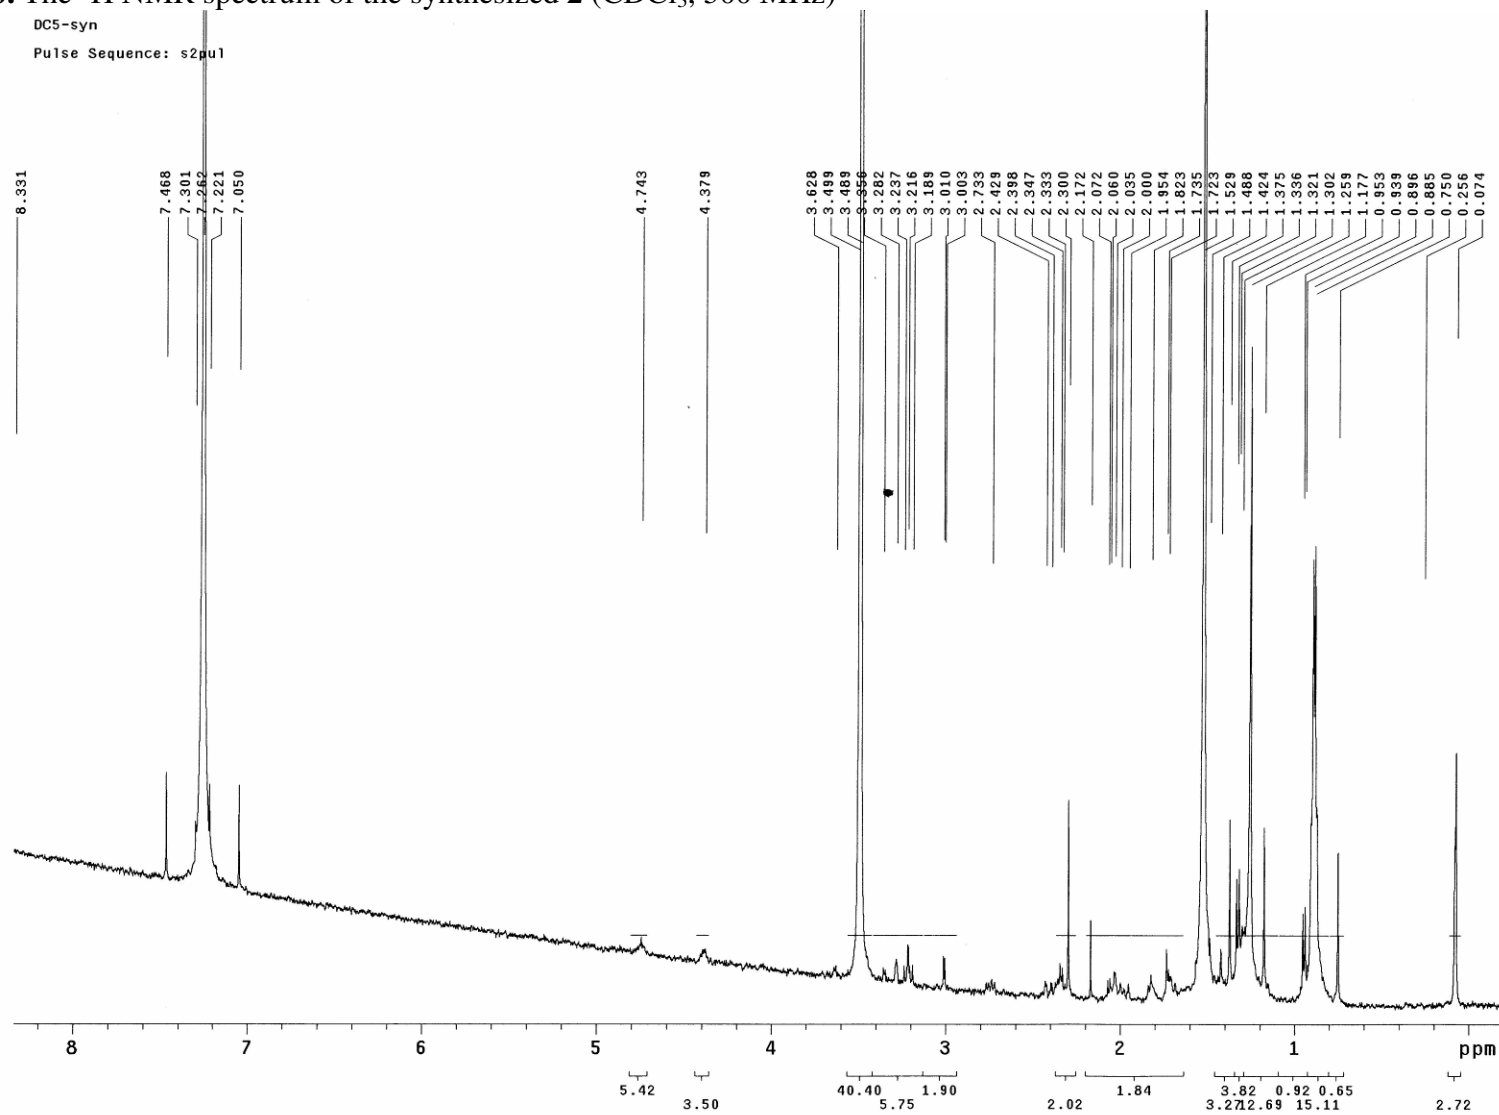

**Table S1.** Effects of compounds **1-2** on NGF secretion in C6 cells and cell viability<sup>a</sup>

| Compound | NGF Secretion | Cell Viability |
|----------|---------------|----------------|
| <b>1</b> | 102.3±4.6     | 103.1±5.0      |
| <b>2</b> | 101.1±1.3     | 104.8±3.9      |

<sup>a</sup> C6 cells were treated with 20  $\mu$ M of compounds **1-2**. After 24 h, the content of NGF secretion in C6-conditioned media was measured by ELISA, and the cell viability was determined by MTT assay. The level of secreted NGF and viable cells expressed as percentage of untreated control. The data shown represent the means  $\pm$  SD of three independent experiments performed in triplicate.
